# Supplementary material for: Triangular radial Nb2O5nanorod growth onc-plane sapphire for ultraviolet-radiation detection
Source: Royal Society of Chemistry journal article supplement (doi:10.1039/c8ra06139d), 2018-01-01
Supplement: c8ra06139d1.pdf [file c8ra06139d1.pdf]

## Electronic Supporting Information

### Triangular radial Nb<sub>2</sub>O<sub>5</sub> nanorod growth on c-plane sapphire for ultraviolet-radiation detection

*Kwan-Woo Kim<sup>1,#</sup>, Bum Jun Kim<sup>2,#</sup>, Sang Hoon Lee<sup>1</sup>, Tuqeer Nasir<sup>2</sup>, Hyung-Kyu Lim<sup>1</sup>, Ik Jun Choi<sup>1</sup>, Byung Joo Jeong<sup>1</sup>, Jaeyeong Lee<sup>3</sup>, Hak Ki Yu<sup>3</sup>, and Jae-Young Choi<sup>1,2,\*</sup>*

<sup>1</sup> School of Advanced Materials Science & Engineering, Sungkyunkwan University, Suwon 16419, Korea

<sup>2</sup> SKKU of Advanced Institute of Nanotechnology (SAINT), Sungkyunkwan University, Suwon, 16419, Korea

<sup>3</sup> Dept. of Materials Science and Engineering, Dept. of Energy Systems Research, Ajou University, Suwon, 16499, Korea

\*Tel: +82(0)31-290-7353, FAX: +82(0)31-290-7410

#These authors contributed equally to this work.

**Table of contents:**

|                 |   |
|-----------------|---|
| 1. Fig. S1..... | 3 |
| 2. Fig. S2..... | 4 |
| 3. Fig. S3..... | 5 |

1. Fig. S1

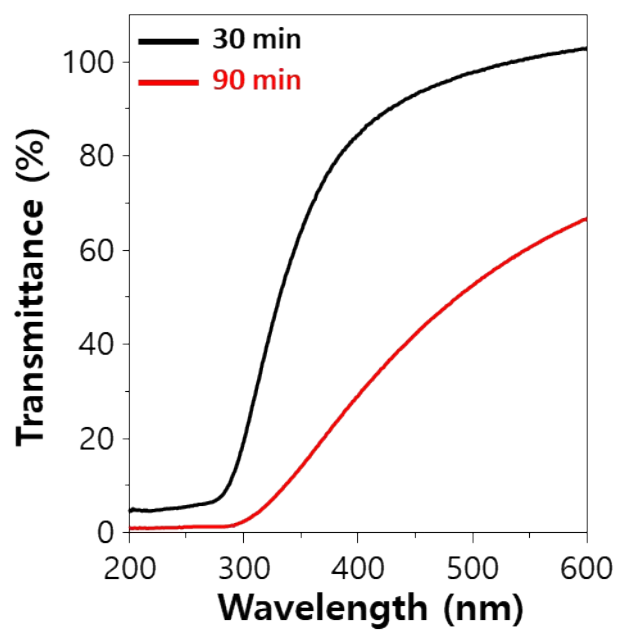

**Fig. S1** Comparison of UV-visible transmittance spectra for the Nb<sub>2</sub>O<sub>5</sub>/c-plane sapphire samples with different synthesis times.

2. Fig. S2

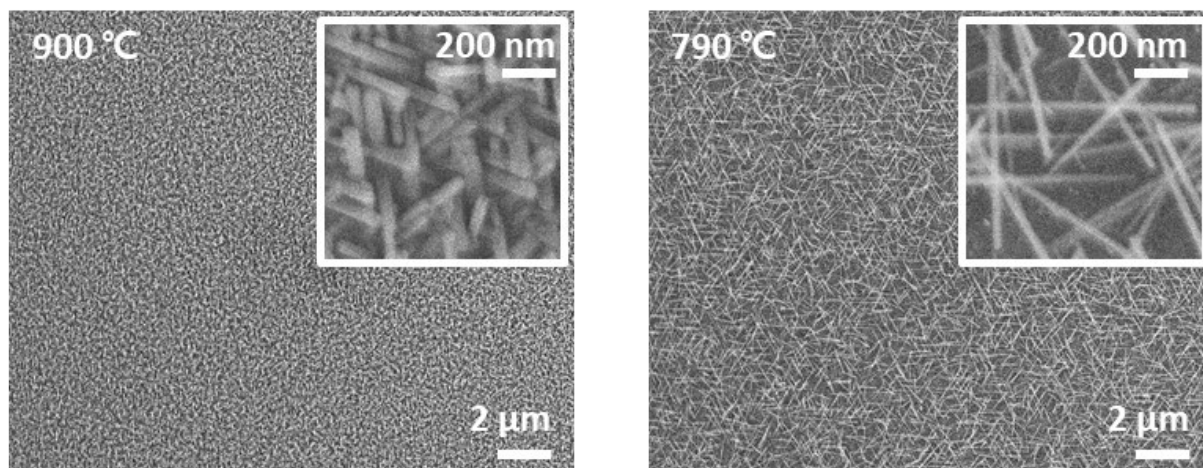

**Fig. S2** Scanning electron microscopy (SEM) images of  $\text{Nb}_2\text{O}_5$  nanorods grown at 900 °C (left) and 790 °C (right) on c-plane sapphire.

3. Fig. S3

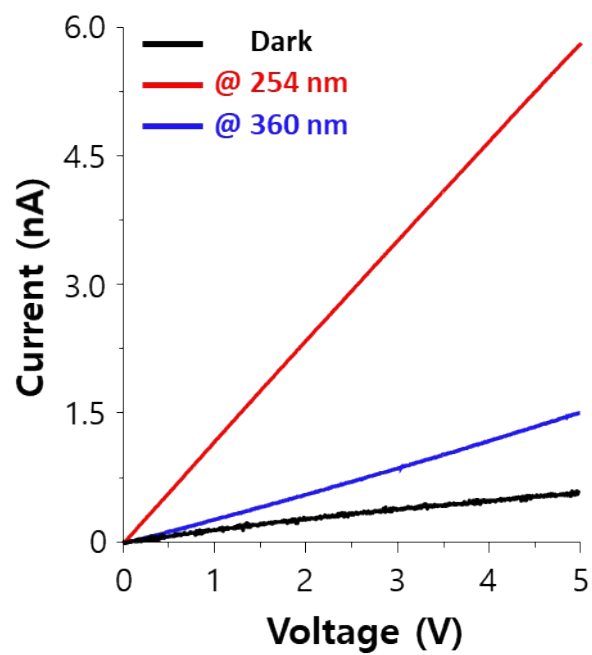

**Fig. S3** I–V characteristics of Nb<sub>2</sub>O<sub>5</sub> grown on c-plane sapphire illuminated with different-wavelength lights of 254 nm, and 360 nm as well as under dark atmosphere.
